# Supplementary material
Source: Springer Nature journal article supplement (https://www.springermedizin.de/resource/supplementary/12890_2012_407_MOESM1_ESM.pdf/9505152)
Supplement: MOESM1 [file 9505152]

**Additional table 1** Genotype frequencies of the studied SNPs among Finnish construction workers according to the existence of different emphysematous changes

| Gene                              | SNP                               | Genotypes | Amino acid change | Radiologic signs of emphysema |                      |                        |                     |                     |                 |
|-----------------------------------|-----------------------------------|-----------|-------------------|-------------------------------|----------------------|------------------------|---------------------|---------------------|-----------------|
|                                   |                                   |           |                   | No changes<br>n (%)           | Any changes<br>n (%) | Centrilobular<br>n (%) | Paraceptal<br>n (%) | Panlobular<br>n (%) | Bullae<br>n (%) |
| <i>GC</i>                         | rs7041<br>(n=941) <sup>a</sup>    | TT        | Glu432Glu         | 254 (42.8)                    | 136 (39.2)           | 83 (36.7)              | 63 (37.5)           | 59 (35.3)           | 54 (43.9)       |
|                                   |                                   | TG        | Glu432Asp         | 278 (46.8)                    | 161 (46.4)           | 113 (50.0)             | 80 (47.6)           | 82 (49.1)           | 57 (46.3)       |
|                                   |                                   | GG        | Asp432Asp         | 62 (10.4)                     | 50 (14.4)            | 30 (13.3)              | 25 (14.9)           | 26 (15.6)           | 12 (9.8)        |
|                                   | rs4588<br>(n=940) <sup>a</sup>    | CC        | Thr436Thr         | 365 (61.4)                    | 216 (62.4)           | 133 (59.1)             | 98 (58.7)           | 105 (62.9)          | 79 (64.2)       |
|                                   |                                   | CA        | Thr436Lys         | 204 (34.3)                    | 117 (33.8)           | 86 (38.2)              | 64 (38.3)           | 56 (33.5)           | 43 (35.0)       |
|                                   |                                   | AA        | Lys436Lys         | 25 (4.2)                      | 13 (3.8)             | 6 (2.7)                | 5 (3.0)             | 6 (3.6)             | 1 (0.8)         |
| <i>MMP1</i>                       | rs1799750<br>(n=944) <sup>a</sup> | GG        |                   | 209 (35.1)                    | 109 (31.3)           | 67 (29.6)              | 42 (24.9)           | 54 (32.3)           | 35 (28.5)       |
|                                   |                                   | G-        |                   | 272 (45.6)                    | 171 (49.1)           | 108 (47.8)             | 90 (53.3)           | 84 (50.3)           | 65 (52.8)       |
|                                   |                                   | --        |                   | 115 (19.3)                    | 68 (19.5)            | 51 (22.6)              | 37 (21.9)           | 29 (17.4)           | 23 (18.7)       |
| <i>MMP9</i>                       | rs3918242<br>(n=942) <sup>a</sup> | CC        |                   | 428 (72.1)                    | 262 (75.3)           | 171 (75.7)             | 124 (73.4)          | 123 (73.7)          | 91 (74.0)       |
|                                   |                                   | CT        |                   | 154 (25.9)                    | 82 (23.6)            | 52 (23.0)              | 44 (26.0)           | 43 (25.7)           | 31 (25.2)       |
|                                   |                                   | TT        |                   | 12 (2.0)                      | 4 (1.1)              | 3 (1.3)                | 1 (0.6)             | 1 (0.6)             | 1 (0.8)         |
| <i>MMP12</i>                      | rs652438<br>(n=941) <sup>a</sup>  | AA        | Asn357Asn         | 549 (92.4)                    | 324 (93.4)           | 210 (92.9)             | 155 (92.3)          | 159 (95.2)          | 116 (94.3)      |
|                                   |                                   | AG        | Asn357Ser         | 45 (7.6)                      | 23 (6.6)             | 16 (7.1)               | 13 (7.7)            | 8 (4.8)             | 7 (5.7)         |
|                                   |                                   | GG        | Ser357Ser         | 0 (0.0)                       | 0 (0.0)              | 0 (0.0)                | 0 (0.0)             | 0 (0.0)             | 0 (0.0)         |
| <i>TIMP2</i>                      | rs2277698<br>(n=940) <sup>a</sup> | GG        |                   | 462 (77.9)                    | 270 (77.8)           | 175 (77.4)             | 123 (73.2)          | 125 (74.9)          | 93 (75.6)       |
|                                   |                                   | GA        |                   | 123 (20.7)                    | 68 (19.6)            | 45 (19.9)              | 39 (23.2)           | 37 (22.2)           | 27 (22.0)       |
|                                   |                                   | AA        |                   | 8 (1.3)                       | 9 (2.6)              | 6 (2.7)                | 6 (3.6)             | 5 (3.0)             | 3 (2.4)         |
| <i>TNF</i>                        | rs1799724<br>(n=939) <sup>a</sup> | CC        |                   | 530 (89.2)                    | 308 (89.3)           | 200 (89.3)             | 152 (90.5)          | 149 (89.2)          | 114 (92.7)      |
|                                   |                                   | CT        |                   | 62 (10.4)                     | 37 (10.7)            | 24 (10.7)              | 16 (9.5)            | 18 (10.8)           | 9 (7.3)         |
|                                   |                                   | TT        |                   | 2 (0.3)                       | 0 (0.0)              | 0 (0.0)                | 0 (0.0)             | 0 (0.0)             | 0 (0.0)         |
|                                   | rs1800629<br>(n=941) <sup>a</sup> | GG        |                   | 465 (78.3)                    | 251 (72.3)           | 163 (72.1)             | 111 (66.1)          | 119 (71.3)          | 90 (73.2)       |
|                                   |                                   | GA        |                   | 120 (20.2)                    | 87 (25.1)            | 60 (26.5)              | 52 (31.0)           | 42 (25.1)           | 31 (25.2)       |
|                                   |                                   | AA        |                   | 9 (1.5)                       | 9 (2.6)              | 3 (1.3)                | 5 (3.0)             | 6 (3.6)             | 2 (1.6)         |
| <i>TGFBI</i>                      | rs1800469<br>(n=917) <sup>a</sup> | GG        |                   | 338 (58.3)                    | 198 (58.8)           | 131 (59.8)             | 98 (60.1)           | 92 (56.8)           | 73 (62.9)       |
|                                   |                                   | GA        |                   | 198 (34.1)                    | 120 (35.6)           | 77 (35.2)              | 57 (35.0)           | 56 (34.6)           | 39 (33.6)       |
|                                   |                                   | AA        |                   | 44 (7.6)                      | 19 (5.6)             | 11 (5.0)               | 8 (4.9)             | 14 (8.6)            | 4 (3.4)         |
|                                   | rs1800470<br>(n=944) <sup>a</sup> | TT        | Leu10Leu          | 297 (49.8)                    | 180 (51.7)           | 118 (52.2)             | 86 (50.9)           | 82 (49.1)           | 67 (54.5)       |
|                                   |                                   | TC        | Leu10Pro          | 243 (40.8)                    | 143 (41.1)           | 93 (41.2)              | 71 (42.0)           | 67 (40.1)           | 52 (42.3)       |
|                                   |                                   | CC        | Pro10Pro          | 56 (9.4)                      | 25 (7.2)             | 15 (6.6)               | 12 (7.1)            | 18 (10.8)           | 4 (3.3)         |
| rs2241718<br>(n=935) <sup>a</sup> | GG                                |           | 436 (73.8)        | 255 (74.1)                    | 173 (77.6)           | 129 (77.7)             | 121 (72.9)          | 99 (81.1)           |                 |
|                                   | GA                                |           | 138 (23.4)        | 82 (23.8)                     | 46 (20.6)            | 36 (21.7)              | 42 (25.3)           | 21 (17.2)           |                 |
|                                   | AA                                |           | 17 (2.9)          | 7 (2.0)                       | 4 (1.8)              | 1 (0.6)                | 3 (1.8)             | 2 (1.6)             |                 |

<sup>a</sup>Number of successful genotyping analysis
